# Supplementary material
Source: PubMed Central journal article supplement (PMC6400962)
Supplement: mmc5.pdf [file mmc5.pdf]

# High-Copy-Number Plasmid Segregation—Single-Molecule Dynamics in Single Cells

Tai-Ming Hsu<sup>1</sup> and Yi-Ren Chang<sup>1,\*</sup>

<sup>1</sup>Department of Physics, National Taiwan Normal University, Taipei, Taiwan

**ABSTRACT** Bacterial high-copy-number (hcn) plasmids provide an excellent model to study the underlying physical mechanisms of DNA segment segregation in an intracellular context. Using two-color fluorescent repressor-operator systems and a synthetic repressible replication origin, we tracked the motion and segregation of single hcn plasmid molecules in individual cells. The plasmid diffusion dynamics revealed between-plasmid temporal associations (clustering) as well as entropic and elastic re-coiling forces in the confined intracellular spaces outside of nucleoids. These two effects could be effectively used in models to predict the heterogeneity of segregation. Additionally, the motile behaviors of hcn plasmids provide quantitative estimates of entropic exclusion strength and dynamic associations between DNA segments. Overall, this study utilizes a, to our knowledge, novel approach to predict the polymer dynamics of DNA segments in spatially confined, crowded cellular compartments as well as during bacterial chromosome segregation.

## INTRODUCTION

DNA segregation, which ensures the passage of the complete genetic information from parent to daughter cells, is a critical process in cell division. Without complications from precisely scheduled and specialized transport of organelles in eukaryotic cells (1,2), bacterial circular chromosome segregation can be accomplished in only a few minutes, alongside the other major chromosomal processes of replication and gene expression (3,4). This high efficiency not only requires precise organization of protein networks (5,6), but it is also influenced by the physical nature of the DNA molecule itself, including the entropic and relaxation states (7,8). As such, the complex functions and massive size of the chromosome present major barriers to understanding the underlying physical mechanisms that determine DNA segregation. Fortunately, plasmids carrying patch sequences can be used to study a wide variety of DNA-related processes because this toolkit can be used to transfer genetic information between cells through transformation, transduction, and conjugation (9,10). Additionally, plasmids can serve as extracellular DNA to modulate biofilm formation (11,12). Because these molecules include only minimal biological elements and have manageable

sequence lengths, plasmid DNA has been utilized as a simplified model to investigate the key factors of DNA segregation (13,14). Among the many different types of plasmids, high-copy-number (hcn) plasmids, which lack an active motor-protein-driven partitioning system (15,16), are widely considered to be the most applicable for studying the general physical properties of DNA segments in a cellular environment.

The mechanisms governing hcn plasmid segregation have been examined by several methodologies, which have provided increasingly detailed information about the process. For example, ColE1-derived plasmids were visualized as fluorescent foci by fluorescence in situ hybridization (17) and fluorescence repressor-operator systems (FROS) (18); the results of those experiments challenged the random distribution model that had been previously predicted from classical studies examining the loss rate (19). Recently, two single-molecule approaches have provided further insight into hcn plasmid segregation. By halting plasmid replication with genetically encoded temperature-sensitive polymerase PolI<sup>ts</sup>, plasmid numbers were drastically diminished in cells, which enabled the necessary spatial resolution for tracking plasmid motion (20). The results of these single-molecule experiments suggested that hcn plasmids are freely diffusible and are only excluded by nucleoids, without other constraints on intracellular localization. Controversially, super-resolution fluorescence in situ hybridization imaging in fixed cells (21) revealed that some plasmids may be distributed within

Submitted October 11, 2018, and accepted for publication January 22, 2019.

\*Correspondence: [yrcchang@ntnu.edu.tw](mailto:yrcchang@ntnu.edu.tw)

Editor: Julie Biteen.

<https://doi.org/10.1016/j.bpj.2019.01.019>

© 2019 Biophysical Society.

nucleoid regions, and observed plasmid clustering implies that there may be interactions between DNA segments. These seemingly inconsistent findings raise two questions regarding the motion and distribution of hcn plasmids in cells (i.e., are plasmids excluded from nucleoids, and are there interactions between plasmids?). Both of these factors would be expected to influence the dynamic behaviors of plasmids. Therefore, we endeavored to address these issues by developing a system to track single plasmids, without removing the interactions with other plasmids. We then applied our system to observe single cells, focusing on cell division and plasmid segregation.

## MATERIALS AND METHODS

### Bacterial strains and growth conditions

Plasmid p15AA-phlFH.tq was introduced into *Escherichia coli* strain BW25113 to create BW25113FH. The strain BW25113FH was then transformed with pTetORK34b and pLacOIC2c for experiments testing incompatibility between plasmids with wt origin. The same strain was transformed with only pTetORK34p or additionally transformed with pLacOIC2c for experiments involving the repression of plasmid replication. Strains transformed with pZC320-tetO or pZC320-lacO, the mini-F-derived plasmids carrying FROS, were used to quantify the fluorescence background and the fluorescence intensity of a single plasmid in cells. In all experiments, bacterial cells were cultured overnight in Luria-Bertani medium (1% wild-type (wt) tryptone, 0.5% wt yeast extract, and 1% wt NaCl; BD Difco Laboratories, Detroit, MI) at 37°C. Overnight cultures were then diluted 1:50–1:100 in M9-supplemented medium (1× M9 salt, 0.5 mg/mL thiamine, 0.15 mg/mL biotin, and 0.1% casamino acids) and cultured with 0.4% glucose at 37°C until reaching an optical density of 0.4–0.6. For experiments that involved repressing replication, the culture media was M9-supplemented medium with 0.2% arabinose. Once the culture population doubled, it was diluted 1:2 to maintain the cells in log-phase growth. In all experiments, the cultures were transferred to a 2% agarose pad (SeaPlaque agarose; Lonza, Basel, Switzerland) made with M9-supplemented medium containing 0.4% glucose and covered by a microscope slide for observation. The concentrations of ampicillin, kanamycin, and chloramphenicol were 100, 50, and 34 ng/mL, respectively. However, all antibiotic selection was removed during the observation period on the 2% agarose pad. When compared to the wt strain (BW25113) under experimental conditions, the transformation of plasmids had negligible effects on the doubling time, the size of nucleoids, and the cell length for all strains used in this study.

### Plasmid constructions

All plasmids were constructed by the in-fusion method. Please see the [Supporting Materials and Methods](#) for a detailed description.

### Imaging and data analysis

The plasmids were imaged in live bacteria using an epifluorescent Olympus IX71 inverted microscope (Olympus, Tokyo, Japan) with a 100× phase contrast oil objective, UPLSAPO100XOPH (numerical aperture 1.4). The fusion proteins mTurquoise, mYFP, and mCherry were excited with 405, 488, and 561 nm lasers (diode-pumped solid-state laser; TWC Opto, New Taipei City, Taiwan) using a multiband filter set (LF405/488/561/635-A-000; Semrock, Rochester, NY). An electron-multiplying charged-coupled device camera (C9100; Hamamatsu Photonics, Hamamatsu, Japan) was

used for image acquisition. For time-lapse imaging, four channels, including the three different fluorescent spectrums and the phase contrast bright-field images, were recorded at each time point. The frame rates for each channel were 0.125 Hz for long-term (cell divisions, across generations) experiments and 2.5 Hz for short-term (local diffusion coefficient) experiments. Images were later extracted and processed by ImageJ- and MATLAB-based programs (The MathWorks, Natick, MA), including ND-SAFIR denoise software (22) to remove electronic noise, TrackMate particle tracking plugin (23) to acquire single-plasmid trajectory, and Schnitzcells (24), which is our home-built supplementary program to analyze the numbers of plasmids within a cell. The details regarding the calibration of fluorescence intensity and error prediction in the number of plasmids per cell are shown in the [Supporting Materials and Methods](#).

## RESULTS AND DISCUSSION

### Resolving single hcn plasmids in vivo

FROS was utilized in earlier reports (18,20) to observe the motion of plasmids in living cells. However, because of the limitations of resolution by diffraction, it is difficult to use FROS to distinguish a single hcn plasmid molecule when all copies are uniformly labeled. We designed a strategy to overcome this issue wherein we labeled single plasmids with different fluorophores. This method allowed the plasmids to be spectrally separable and spatially resolvable from other copies in the same cell. To achieve this goal, two rationally designed elements were incorporated. One encodes a two-color fluorescent-labeling system to separate plasmids into two populations, and the other limits expression of one of the populations to allow spatial resolvability.

To generate spectrally separable labels, two repressor-operator systems (tetracycline repressor/operator and lactose repressor/operator) were utilized after confirming they do not interfere with the segregation of plasmids that have identical replication origins. Two *cer*-deleted ColE1-derived plasmids, pTetORK34b (P1) and pLacOIC2c (P2), respectively encoding ( $P_{tet}::tetR-myfp::tetO$  array) and ( $P_{lac}::lacI^{adi}-mcherry::lacO$  array), were constructed (Fig. 1 A). Notably, expression of the fluorescent repressors is self-regulated by the tetracycline and lactose promoters. Thus, our system stands in contrast to those that are controlled by other inducible promoters (e.g., the arabinose induction system (18)), for which the concentration of inducing agents controls the number of repressor molecules in the cells. Instead, encoding the repressor in each plasmid serves to correlate the total repressor expression level with the number of plasmids (25). This feedback circuit also automatically locks the expression level during the visualization of plasmids. The fluorescence intensities of single cassettes were resolved and quantified by inserting the cassettes into single-copy mini-F-derived plasmids and monitoring their expression in living cells ([Supporting Materials and Methods](#); Fig. S1 B). These calibrations provided a reference that could be used to identify single hcn plasmids according to the intensities of fluorescent spots. Furthermore, the minor interaction between plasmids that

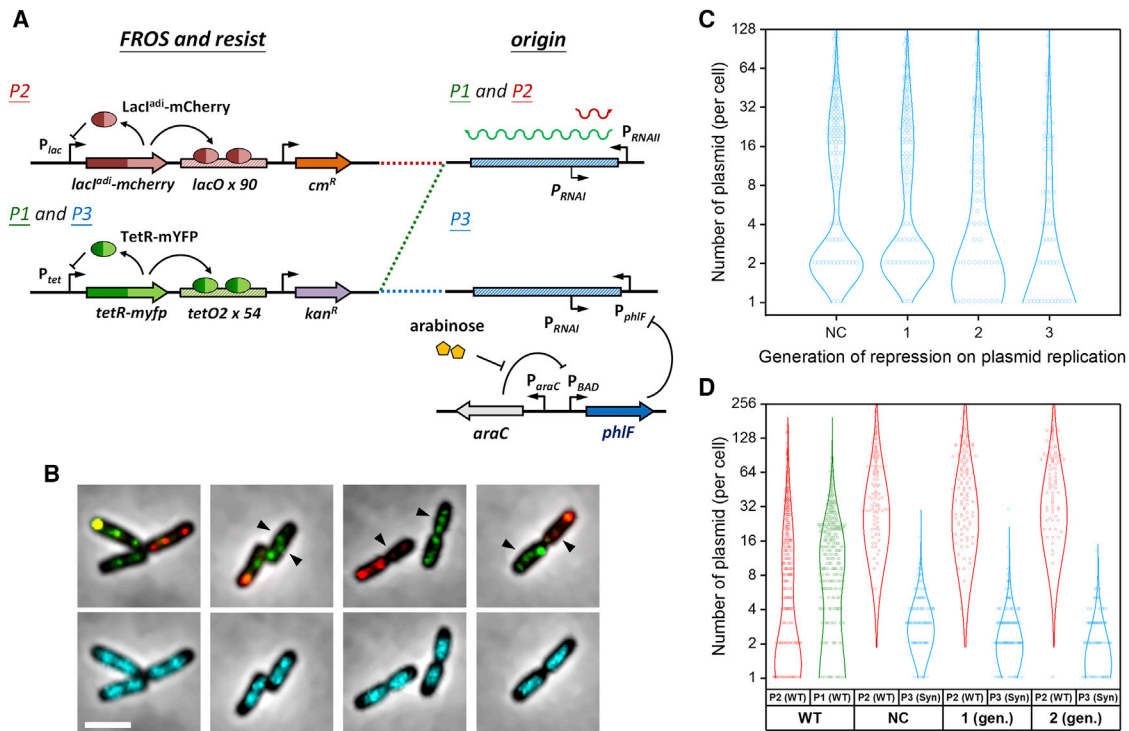

**FIGURE 1** Single hen plasmid molecules can be resolved by two-color FROS and copy-number control systems. (A) The design schemes of the self-regulated TetR-YFP/*tetO* and LacI<sup>adi</sup>-mCherry/*lacO* systems are shown. Antibiotic resistance and replication origins, both wt (pTetORK34b (P1) and pLacOIC2c (P2)) and synthetic (pTetORK34p (P3)), are also shown. LacI<sup>adi</sup> is a LacI mutant that can only form dimers, not tetramers. (B) Photomicrographs show phase contrast images of cells merged with fluorescence images of cotransformed plasmids (P1 (upper panel, green) and P2 (upper panel, red)) or nucleoids (lower panel, cyan). The arrows indicate probable single plasmids that are traveling around the nucleoids. Scale bars, 3  $\mu$ m. Violin plots show the estimated numbers of plasmids in cells according to generations of repression. (C) Cells were transformed with only P3 (cyan), or (D) cells were additionally transformed with the wt plasmid, P2 (red). The estimated plasmid numbers without repression are presented as the negative control (NC), and those in cells cotransformed with P1 (green) and P2 are also shown for comparison. The circles and lines are histograms and Gaussian fits, respectively. The numbers of cells in the analyzed in (C) are 151, 127, 88, and 87 from left to right. In (D), the numbers of cells are 290, 124, 136, and 103 from left to right. Of note, the asymmetry between P1 and P2 may be due to differences in antibiotic selection. To see this figure in color, go online.

arises because of the inclusion of FROS cassettes can be neglected (Supporting Materials and Methods).

To reduce the population of plasmids, replication control may be the most efficient method (20,26). Indeed, because of incompatibilities between the ColE1 derivatives in the same host cell, the two wt plasmid populations were non-evenly distributed (Fig. 1 D; Fig. S1 D). However, with this experimental design, only 10% of cells exhibited a single plasmid that could be differentiated from the majority ( $N_{P1} = 1$  or  $N_{P2} = 1$ ). To further improve our ability to track single plasmids, a repressible ColE1-derived replication origin was designed to control the numbers of the plasmid in the host cells. We replaced the native promoter,  $P_{RNAII}$ , which regulates the synthesis of the replication initiation primer *RNAII* (26,27), with the promoter,  $P_{phIF}$ , which is modulated by the transcriptional repressor PhIF (28). Then, we expressed PhIF via an arabinose induction system, effectively suppressing the replication of plasmid pTetORK34p (P3) (Fig. 1 A). Under this system of repression, the numbers of P3 in the host cells could be reduced after dilution by cell division.

In BW25113FH cells transformed with P3, two major populations of cells were observed as determined by the number of plasmids per cell. The plasmid-rich population had roughly 20 plasmids per cell, whereas the plasmid-poor population had  $\sim 2$  plasmids per cell. In cultures with repressed replication, the plasmid-rich population (peak value  $\sim 20$  plasmids) was diminished almost entirely within only a few cell generations, and the mode value of the plasmid-poor population was simultaneously shifted from 2 to 1. Furthermore, the cells transformed with both P2 and P3 (Fig. 1 D), but without PhIF protein expression, already exhibited relatively low levels of P3, probably because of competition for replication factors. Interestingly, the mutant replication origin in P3 seemed to be relatively unstable compared to the wt; however, the plasmid P3 was found to autonomously replicate and was sustained in the host cells for multiple generations without replication repression. After repressing P3 replication for two cell generations, the estimated number of plasmids was three or less in more than half of the cells, making single-plasmid tracking much more feasible (Fig. 2 A and S2 A; Video S2).

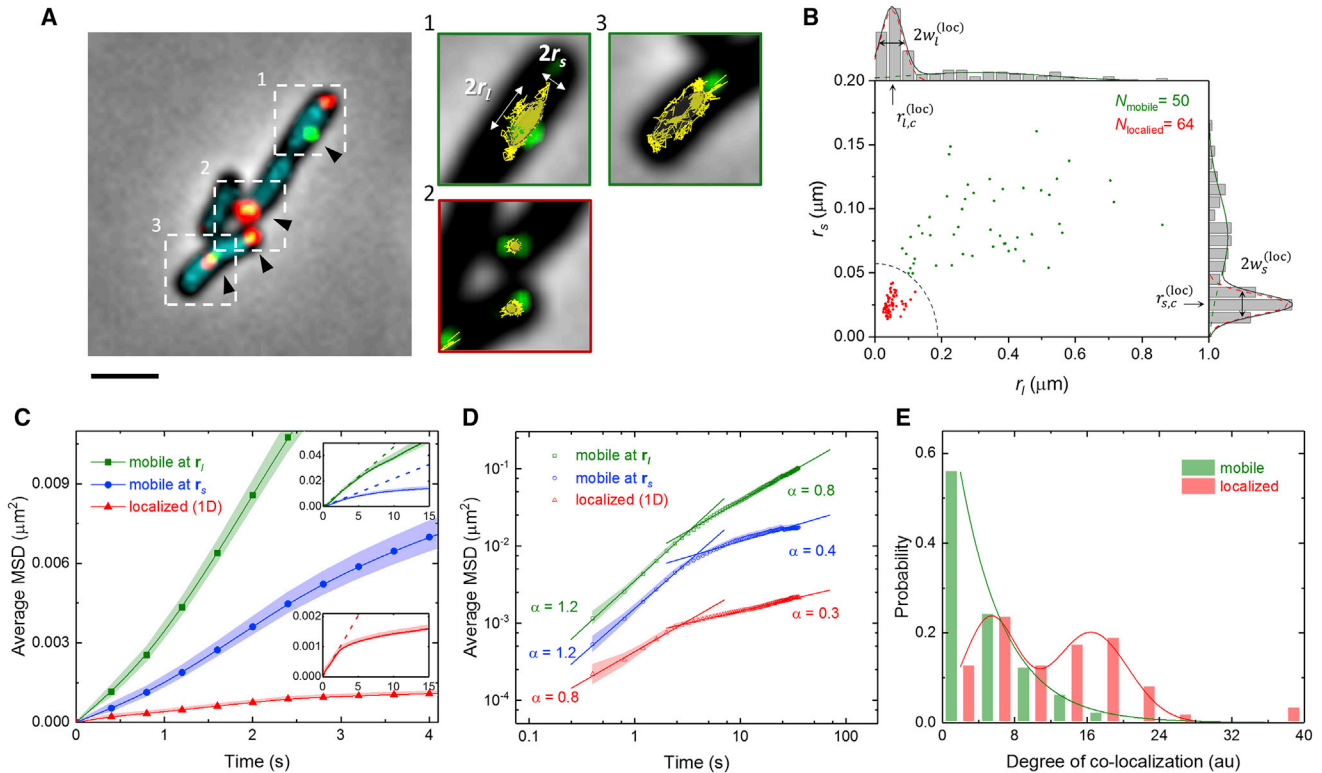

**FIGURE 2** The motion of single plasmids in cells. (A) A merged image shows phase contrast, and fluorescent nucleoids (cyan), single P3 plasmids (green), and P2 (red). The enlarged images correspond to the regions indicated by dashed boxes; only the fluorescence of P3 plasmids is shown along with the plasmid trajectories (yellow lines). To better visualize single plasmids, the green fluorescence intensity is 12-fold higher than that shown in Figs 1 A and S1 A. Scale bars, 2  $\mu\text{m}$ . (B) Scatter plot and histograms show the characteristic lengths of 5-min trajectories. The dashed line indicates the cutoff criterion separating the localized (red) and mobile (green) groups. (C) and (D) are the average mean-square displacements of the trajectories of the localized (red) plasmids as well as those for mobile plasmids along the long (green) and short (blue) characteristic axes. The color bands represent the standard errors of the means. The solid and dashed lines in the insets of (C) are the experimental data and the linear fits where  $\tau \leq 2$  s, respectively. (E) Colocalization of tracked plasmids with untracked plasmids is shown for single mobile (green) and localized (red) plasmids. The green line shows the Poisson distribution with an expected value of 4.7 arbitrary units (au), and the red line serves as a guide to the eye. To see this figure in color, go online.

Thus, we utilized this regression process to track the motions of single P3 plasmids in all further experiments.

### Association and clustering of plasmids

Combining two-color FROS and replication control strategies, we were able to track a single mutant plasmid P3, successfully resolving it from the majority, wt P2, in the same host cell. According to the trajectories of the single P3 molecules, the plasmids commonly diffuse to the cell poles and midcell regions while occasionally moving across/around the nucleoids (visualized by HupA-mTurquoise2 (29)). To characterize the traveled region of a single P3 molecule, a gyration tensor describing the plasmid path during a 5 min observation period was calculated. The gyration tensor was defined as:  $S_{mn} = \sum_{i=1}^N r_m^{(i)} r_n^{(i)} / N$ , where  $m$  and  $n$  are the coordinates of the tracked location  $(r_1^{(i)}, r_2^{(i)})$  relative to the center of the trajectory at each time point, and  $N$  is the number of the time points. As a simplified quantification, the eigenvalues ( $r_l^2$  and  $r_s^2$ ) and respective eigenvectors of the gyration tensor were calculated to determine the lengths

and the directions of two orthogonal characteristic axes of plasmid motion (Fig. 2 B). Based on two-peak Gaussian fittings of the  $r_l$  and  $r_s$  (for the long and short axes) length distributions, the motions of plasmids can be reasonably and sufficiently separated into the two groups, either “mobile” or “localized,” according to the long axis displacement. A cutoff criterion to separate these groups was defined as  $[r_l / (r_{l,c}^{(loc)} + 2w_l^{(loc)})]^2 + [r_s / (r_{s,c}^{(loc)} + 2w_s^{(loc)})]^2 = 1$ , which is the arc of an ellipse shown as a dashed line in Fig. 2 B. The lengths of the axes are  $(r_{l,c}^{(loc)} + 2w_l^{(loc)})$  and  $(r_{s,c}^{(loc)} + 2w_s^{(loc)})$ , where the means,  $r_{l,c}^{(loc)}$  and  $r_{s,c}^{(loc)}$ , as well as the widths,  $w_l^{(loc)}$  and  $w_s^{(loc)}$ , of the localized group were determined from the Gaussian fit shown in Fig. 2 B. According to this criterion, the portion of mobile plasmids was  $\sim 45\%$ , and localized plasmids accounted for the remaining 55% of 114 observed individual plasmids.

Furthermore, the diffusive properties of the mobile and localized plasmids were compared based on the mean-square displacements (MSD) of the trajectories. As shown in Fig. 2, C and D, the trajectories of the mobile plasmids



can be rationally separated into components along the characteristic short and long axes of the traveled regions. Thus, the two-dimensional (2D) MSD of the localized plasmid trajectories can be divided by two to better compare the magnitudes. Using simple linear fits for MSD ( $\tau$ ) where  $\tau \leq 2$  s (Fig. S2 B), we found that the mobile plasmids were more diffusive than localized plasmids and exhibited anisotropy with regard to the short and long axes. From an anomalous diffusion analysis ( $\text{MSD} \sim D_{\text{app}}\tau^\alpha$ ), we found that both the magnitude of the diffusivity and the diffusion behaviors change over different timescales. In the mobile group, a slightly superdiffusive behavior ( $\alpha > 1$ ) over a short timescale ( $\tau < 2$  s) implied that the plasmid exhibited directional motion when exiting the nucleoid region as will be discussed later. Over a long timescale ( $\tau > 5$  s), subdiffusive behavior ( $\alpha < 1$ ) indicated that the plasmid was confined, probably because of repulsion in the cellular environment (30,31). Because the characteristic long axis only slightly deviated from the direction that defined cell length in most cases, this anisotropic diffusion may occur based on the asymmetric geometry of the intracellular space. In contrast to the mobile group, the localized group exhibited subdiffusive behavior and stronger suppression of diffusion at every timescale, implying that this population of molecules is under additional constraints. To examine if the differences in diffusion behaviors were related to plasmid-plasmid interactions, the plasmid motions were compared to those in cells only carrying P3 (Fig. S2, C and D). The comparison revealed that single plasmids exhibit similar behaviors to the mobile plasmids in cotransformed cells.

In addition, the colocalization of P2 and P3 plasmids was investigated. Though the exact numbers of colocalized plasmids cannot be directly resolved from the 2D images, the degree of colocalization provides an estimation of the number of P2 plasmids that overlap with the tracked P3 plasmid. For each frame, the area of the tracked P3 plasmid was considered to be a circle of 100-nm diameter (the Kuhn length of DNA in cells), centered at the fitted location. The degree of colocalization was then determined as the time average of the intensity of overlapping P2 plasmids divided by the intensity of a single plasmid. As shown in Fig. 2 E, the degree of colocalization between mobile plasmids and P2 was well fitted by a Poisson distribution, suggesting that the colocalization of these plasmids is likely to be a discrete, independent, and random process. This result further implies that the mobile plasmids were free from specific associations with other plasmids. On the other hand, the localized P3 plasmids were often found to be colocalized with P2 plasmids; thus, we speculate that the localized population was directly or indirectly associated with P2 plasmids in clusters. Furthermore, the localized P3 plasmids exhibited a limited region of motion ( $\sim 70$  nm on average), which can be taken as a rough estimation of cluster size that is consistent with earlier estimates by super-resolution imaging (21). Additionally, the size implies

that the clustering may be induced by the biological factors (e.g., replisomes (20,32) and transcription factories (33–35), which are known to be capable of gathering DNA segments into the same machinery).

### Volume exclusion effect from the nucleoids

Large clusters (observed as brighter fluorescent foci) were mostly distributed in the nucleoid-free region, and only single plasmids were found to infrequently travel across the nucleoid regions (Figs. 1 B, 2 A, and S1 A; Video S1). The infrequency of nucleoid traverse by mobile plasmids suggested that the nucleoids constrain the motions of plasmids, regardless of their association with other plasmids in the cell. This exclusion effect by the nucleoid could also be observed in newly divided cells, which were quasiquantitatively identified by nucleoid fluorescence intensity, as shown in Fig. 3 A. The distribution of plasmids was higher at the old pole than the new pole and also broader in width than the nucleoid especially in the region that nucleoid locates.

We also performed long-term tracking of single plasmids and simultaneously recorded the nucleoid profiles along the long axis of the cell. The movement of plasmid DNA across the nucleoid was observed at every stage of the cell cycle, but the probability of nucleoid transit was not uniform throughout the cell cycle (Video S3). This lack of uniformity suggests a relationship between the motility of the plasmids and the physiological state of the nucleoids (Fig. 3 B). Interestingly, the highest probability of nucleoid-crossing events was roughly at the end of the first quarter of a cell cycle when the nucleoid initiated segregation. It can be speculated that the nucleoid blocks diffusion of plasmids, and its obstructive strength is related to the density of the chromosome, which is lowest during segregation and highest just after the completion of replication. An additional discovery from our long-term tracking experiment was that although roughly the half of the plasmids in the population should have been prevented from crossing the nucleoid because of clustering, only 3 out of 43 plasmids exhibited a complete lack of nucleoid crossing along an entire cell cycle. This result implies that although the association between plasmids is common, it is not enduring, and the strength may be weak. Thus, most plasmids seem to dissociate from the clusters at least once within a cell cycle. This speculation is further supported by the short temporal profiles of replication and transcription (36).

Based on our measurements, the space between the cell boundary and the nucleoid is  $\sim 150$  nm (Fig. 3 A), which is smaller than the full-spread size of an unconfined supercoiled plasmid (more than 200 nm) as estimated by twice the radius of gyration (37). This geometry can be modeled as an entropic barrier between the nucleoid and nucleoid-free regions. Because of this spatial confinement, a plasmid as a polymer will experience entropic and elastic recoiling forces (38–40) when exiting the nucleoid region, which

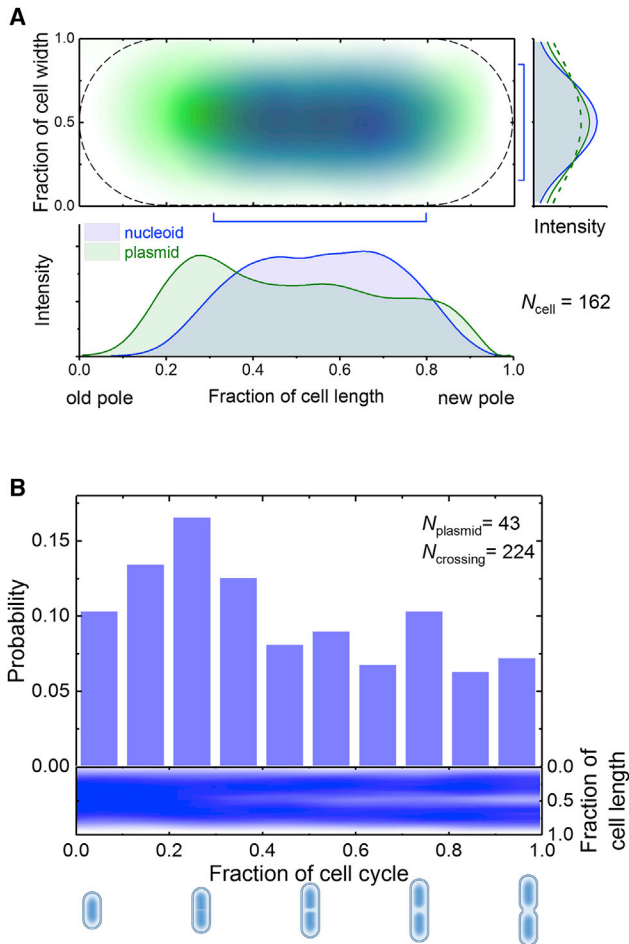

**FIGURE 3** Plasmid exclusion from the nucleoid region as shown by the spatial distribution and motion of plasmids. (A) The average fluorescence intensity of the nucleoids (blue) and all plasmids (green) in newly divided cells is presented in a 2D map (upper panel). Intensities are shown along the long (lower panel) and short (right panel) axes of the cells. The solid and dashed lines indicate the respective distribution profiles of the whole cell and the nucleoid region indicated on the 2D map. (B) The probability of the nucleoid-crossing events (upper panel) and the nucleoid distribution along the direction of the cell length (lower panel) is shown according to the cell cycle. The illustrations below the  $x$  axis represent the states of the nucleoid segregation in cells. To see this figure in color, go online.

potentially explains the superdiffusive motions recorded in short timescales (Fig. 2 D). On the other hand, according to our observations, a plasmid is expected to undertake an average of five crossing events during one whole 50-min cell cycle, with each crossing event averaging around 80 s. Thus, the probability for a single plasmid to be found in the nucleoid region was 13%. Also, only half of the plasmids were free from clusters, so the probability of observing a free plasmid in nucleoid-free region  $P_{fr}$  was calculated to be  $\sim 3$ -fold higher than that in the nucleoid region  $P_{nuc}$ . Because the volumes of these two regions are roughly equal (according to the width and length of nucleoids, Fig. 3, A and B), the probability difference does not require normalization to volume. Therefore, equipartition theorem and the

calculated probabilities of observing plasmids in the nucleoid and nucleoid-free regions can provide a rough estimation of the barrier height between the compartments as  $\Delta E/k_B T^* \sim \ln(P_{fr}/P_{nuc}) \sim 1$ , where  $k_B T^*$  is the effective thermal energy in cells. Notably, the activity of ATP-dependent enzymes will affect the fluctuating motions of DNA in cells (41). According to the diffusion behaviors of chromosome loci, the effective temperature  $T^*$  should be two- to sevenfold higher than that of a room-temperature culture environment  $T$ , depending on the phase in the cell cycle (8). Although plasmids may not exhibit protein interactions as frequently as chromosomes, entanglement and repulsion from the chromosome are likely to alter the motion of the plasmids. Based on these and other uncertainties, this calculation represents a simplified order-of-magnitude estimation of the barrier height.

### Heterogeneity of hcn plasmid segregation

Because of the effects of association between plasmids and volume exclusion from the nucleoids, we speculated that the heterogeneity of hcn plasmid segregation should be high. An added benefit of the self-regulated FROS cassette is that it is possible to quantify the distributions of parental and inherited plasmids ( $N_P$  and  $N_D$ ) in a cell division as shown in Fig. 4 B. We clearly observed a broader distribution of inherited plasmid copies than that would be predicted by a random segregation model, which is represented by a binomial distribution with an equal probability of distribution to each daughter cell. Therefore, we applied a simplified segregation model (Fig. 4 A), which includes two segregation steps and an intervening replication step, to further investigate the effects of impeded plasmid motility on segregation. In the model, the original plasmid,  $N_P^0 (= N_P/2)$ , is initially localized entirely in the old half of the cell. In the first segregation step, a portion of the plasmids,  $N_{i,1}^o$ , are transferred from the old to the new half. Then, in the replication step, the plasmid copies in both halves are simply assumed to be doubled. Finally, after another exchange of  $N_{i,2}^o$  and  $N_{i,2}^n$  plasmids between the old and new halves in a second segregation event, the numbers of the plasmids in each half are fixed in the respective daughter cells. The final number of plasmids segregated to the old half can be calculated as  $N_D^o = 2(N_P^0 - N_{i,1}^o) - N_{i,2}^o + N_{i,2}^n$ . The numbers and the respective probability of the transferred plasmids in the segregation steps were determined as follows. Among all  $N$  plasmids found in the original half, a portion,  $N_r$ , determined by the proportionality constant  $p_r$ , are clustered and retained. In the rest of the segregable plasmids,  $N_s (= N - N_r)$ , the probability of transferring  $N_t$  plasmids to the other half can be determined by a binomial distribution  $P_b(N_t; N_s, p_t)$ , where the transfer probability  $p_t < 0.5$ , because of nucleoid exclusion. Therefore, the probability of a combination of the segregable and transferred plasmid numbers in the two segregation steps can be

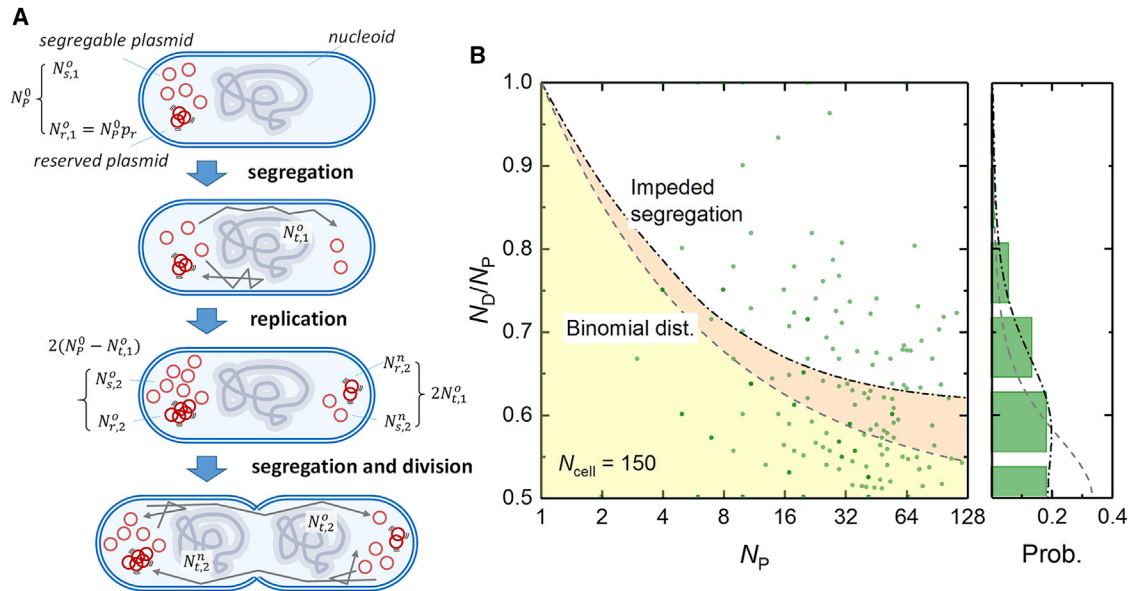

FIGURE 4 The heterogeneity of hcn plasmid segregation. (A) A scheme showing the simplified impeded model of plasmid segregation, which includes two segregation steps and an intervening replication step. This model represents the processes of plasmid transfer between cell halves and the doubling of the plasmid copies after replication. (B) The proportion of inheritance ( $N_D/N_P$ ) of plasmids (green spots) with respect to the copy number in parent cells (left panel) is shown. Each spot indicates a single division event. The upper boundaries of the yellow (gray dashed line) and orange (black dot-dashed line) regions are predicted from the deviations of the probability distributions following the simple random segregation model (analytical solution,  $0.5 + N_P^{-1/2}$ ) and the impeded segregation model (numerical solution), respectively. The right panel shows the probability distribution of the proportion of inheritance from the experimental results (green bars) as well as the prediction from the random segregation scenario (gray dashed line) and the impeded segregation model (black dot-dashed line). Because of symmetry and the fact that all plasmids should be eventually segregated into either one of the daughter cells, only the half region of the proportion of inheritance ( $N_D/N_P \geq 0.5$ ) is shown. To see this figure in color, go online.

represented as  $P_b(N_{t,1}^o; N_{s,1}^o, p_t)P_b(N_{t,2}^o; N_{s,2}^o, p_t)P_b(N_{t,2}^n; N_{s,2}^n, p_t)$ , where  $N_{s,1}^o$ ,  $N_{s,2}^o$  and  $N_{s,1}^n$  are the segregable plasmid numbers in the segregation steps. Because more than one combination of  $N_{t,1}^o$ ,  $N_{t,2}^o$ , and  $N_{t,2}^n$  may produce a particular  $N_D^o$ , all possible combinations should be summed to calculate the respective probability  $p(N_D^o)$ . Notably, the probability that a number of inherited copies,  $N_D$ , will be found in either daughter cell can be determined as  $P(N_D) = [P(N_D^o = N_D) + P(N_D^o = N_P - N_D)]/2$ . By fitting the probability distribution of the proportion of inheritance  $N_D/N_P$  as a function of the all measured  $N_P$  values, we found that  $p_r = 0.05$  and  $p_t = 0.3$ . These results agree with the observation that nucleoid crossing occurs throughout the whole cell cycle as well as the limited number of crossing events and short time spent in the nucleoid region. Also, 55% of the events were within the deviation of the distribution predicted by this simplified impeded segregation model. Although the model predicts this value should be 62%, it still performs much better than the simple random segregation model, in which only 33% of the experimental events were within the deviation, which was predicted to be 68%. Additionally, the effectiveness of our impeded segregation model was compared to the random segregation model using the Akaike information criterion (42), which can estimate the relative information lost between two test models based on the fitting residuals and the number of the parameters in each model. According to this compari-

son, the probability of the null hypothesis that the random segregation model was better able to explain the information in the experiment is less than  $10^{-6}$ . Therefore, the better fit of the simplified impeded segregation model was confirmed to be an informative improvement over the random segregation model and not simply the overfitting of the data. Further, the predictive nature of the simplified impeded segregation model also supports the idea that plasmid association and nucleoid exclusion are determinants of DNA segment motion in vivo.

Based on the heterogeneity of inherited hcn plasmid copy numbers, it may be predicted that some rate of plasmid loss would occur in the host cells. However, with regard to population fitness, this loss of genetic material may be compensated by improvements in the diversity of the population. As the carrier for horizontal gene transfer, plasmids serve as genomic patches that often play crucial roles in the survival of host cells. In diverse and variable environments, the appropriate population distribution of plasmids is determined by a balance between the burden of carrying the plasmid and the total fitness provided by the genes encoded in the plasmids (43,44). Higher population diversity provides a better opportunity to optimize the number of plasmid copies across the population of host cells. In other words, heterogeneity of plasmid copy numbers may increase the persistence of bacterial cells in different conditions as well as the difficulty to control pathogens and bacteria in biofilm states.

## CONCLUSIONS

Leveraging single-molecule and single-cell observations, we found that a few dominant factors determine plasmid motion (i.e., the association between plasmids and exclusion by nucleoids) and can sufficiently explain heterogeneity of segregation. Moreover, we were able to quantify the influence of each factor on segregation. The principles underlying the dynamics of plasmid motion may be generalizable to the physical behaviors of many types of DNA segments transiting in cellular environments. We found non-negligible entropic differences between the nucleoid and non-nucleoid space, which led to the confinement of DNA segments to crowded and complex cellular compartments. Quantification of these entropic differences allowed us to estimate the strength of the DNA segment exclusion by chromosomes. Additionally, the coexistence of a large population of plasmids in clusters and the high probability of observing plasmids transiting across nucleoids suggest that interactions between DNA segments are both common and variable. These interactions have been suggested to be a driving force of bacterial chromosome organization and segregation (34,45) and appear to depend on the state of the chromosomes. The insights gained herein will be helpful for further understanding the physics of bacterial chromosome segregation.

## SUPPORTING MATERIAL

Supporting Materials and Methods, three figures, one table, and three videos are available at [http://www.biophysj.org/biophysj/supplemental/S0006-3495\(19\)30055-4](http://www.biophysj.org/biophysj/supplemental/S0006-3495(19)30055-4).

## AUTHOR CONTRIBUTIONS

Y.-R.C. conceived and designed the experiments. T.-M.H. performed the experiments. Y.-R.C. and T.-M.H. analyzed the data. Y.-R.C. derived the model and wrote the article.

## ACKNOWLEDGMENTS

We thank Dr. Chia-Fu Chou (Academia Sinica, Taiwan) and Dr. Jung-Ren Huang (Academia Sinica, Taiwan) for their beneficial discussion. We appreciate Dr. Wen-Chen Tsai's support on the calibration of plasmid numbers in cells by quantitative PCR. We are also grateful to Dr. Chia-Fu Chou and Dr. Kenn Gerdes (University of Copenhagen, Denmark) for their kind donations of plasmids pSOT37 and pJM178, respectively.

This work was supported by the Ministry of Science and Technology, Taiwan (NSC 102-2112-M-003-019-MY3 and MOST 106-2112-M-003-012).

## REFERENCES

- Murray, A. W. 1992. Creative blocks: cell-cycle checkpoints and feedback controls. *Nature*. 359:599–604.
- Ruchaud, S., M. Carmena, and W. C. Earnshaw. 2007. Chromosomal passengers: conducting cell division. *Nat. Rev. Mol. Cell Biol.* 8:798–812.
- Wang, J. D., and P. A. Levin. 2009. Metabolism, cell growth and the bacterial cell cycle. *Nat. Rev. Microbiol.* 7:822–827.
- Reyes-Lamothe, R., E. Nicolas, and D. J. Sherratt. 2012. Chromosome replication and segregation in bacteria. *Annu. Rev. Genet.* 46:121–143.
- Kleckner, N., J. K. Fisher, ..., G. Witz. 2014. The bacterial nucleoid: nature, dynamics and sister segregation. *Curr. Opin. Microbiol.* 22:127–137.
- Badrinarayanan, A., T. B. Le, and M. T. Laub. 2015. Bacterial chromosome organization and segregation. *Annu. Rev. Cell Dev. Biol.* 31:171–199.
- Jun, S., and A. Wright. 2010. Entropy as the driver of chromosome segregation. *Nat. Rev. Microbiol.* 8:600–607.
- Lampo, T. J., N. J. Kuwada, ..., A. J. Spakowitz. 2015. Physical modeling of chromosome segregation in *Escherichia coli* reveals impact of force and DNA relaxation. *Biophys. J.* 108:146–153.
- Thomas, C. M., and K. M. Nielsen. 2005. Mechanisms of, and barriers to, horizontal gene transfer between bacteria. *Nat. Rev. Microbiol.* 3:711–721.
- Johnsen, A. R., and N. Kroer. 2007. Effects of stress and other environmental factors on horizontal plasmid transfer assessed by direct quantification of discrete transfer events. *FEMS Microbiol. Ecol.* 59:718–728.
- Mann, E. E., K. C. Rice, ..., K. W. Bayles. 2009. Modulation of eDNA release and degradation affects *Staphylococcus aureus* biofilm maturation. *PLoS One*. 4:e5822.
- Madsen, J. S., M. Burmølle, ..., S. J. Sørensen. 2012. The interconnection between biofilm formation and horizontal gene transfer. *FEMS Immunol. Med. Microbiol.* 65:183–195.
- Gerdes, K., J. Møller-Jensen, and R. Bugge Jensen. 2000. Plasmid and chromosome partitioning: surprises from phylogeny. *Mol. Microbiol.* 37:455–466.
- Ghosh, S. K., S. Hajra, ..., M. Jayaram. 2006. Mechanisms for chromosome and plasmid segregation. *Annu. Rev. Biochem.* 75:211–241.
- Dmowski, M., and G. Jagura-Burdzy. 2013. Active stable maintenance functions in low copy-number plasmids of Gram-positive bacteria I. Partition systems. *Pol. J. Microbiol.* 62:3–16.
- Baxter, J. C., and B. E. Funnell. 2014. Plasmid partition mechanisms. *Microbiol. Spectr.* 2. Published online November 7:2014. <https://doi.org/10.1128/microbiolspec.PLAS-0023-2014>.
- Pogliano, J., T. Q. Ho, ..., D. R. Helinski. 2001. Multicopy plasmids are clustered and localized in *Escherichia coli*. *Proc. Natl. Acad. Sci. USA*. 98:4486–4491.
- Yao, S., D. R. Helinski, and A. Toukdarian. 2007. Localization of the naturally occurring plasmid ColE1 at the cell pole. *J. Bacteriol.* 189:1946–1953.
- Durkacz, B. W., and D. J. Sherratt. 1973. Segregation kinetics of colicinogenic factor col E1 from a bacterial population temperature sensitive for DNA polymerase I. *Mol. Gen. Genet.* 121:71–75.
- Reyes-Lamothe, R., T. Tran, ..., M. E. Tolmasky. 2014. High-copy bacterial plasmids diffuse in the nucleoid-free space, replicate stochastically and are randomly partitioned at cell division. *Nucleic Acids Res.* 42:1042–1051.
- Wang, Y., P. Penkul, and J. N. Milstein. 2016. Quantitative localization microscopy reveals a novel organization of a high-copy number plasmid. *Biophys. J.* 111:467–479.
- Boulanger, J., C. Kervrann, ..., J. Salamero. 2010. Patch-based nonlocal functional for denoising fluorescence microscopy image sequences. *IEEE Trans. Med. Imaging.* 29:442–454.
- Tinevez, J. Y., N. Perry, ..., K. W. Eliceiri. 2017. TrackMate: an open and extensible platform for single-particle tracking. *Methods*. 115:80–90.
- Young, J. W., J. C. Locke, ..., M. B. Elowitz. 2011. Measuring single-cell gene expression dynamics in bacteria using fluorescence time-lapse microscopy. *Nat. Protoc.* 7:80–88.



25. Wong Ng, J., D. Chatenay, ..., M. G. Poirier. 2010. Plasmid copy number noise in monoclonal populations of bacteria. *Phys. Rev. E Stat. Nonlin. Soft Matter Phys.* 81:011909.
26. Panayotatos, N. 1984. DNA replication regulated by the priming promoter. *Nucleic Acids Res.* 12:2641–2648.
27. Eguchi, Y., T. Itoh, and J. Tomizawa. 1991. Antisense RNA. *Annu. Rev. Biochem.* 60:631–652.
28. Stanton, B. C., A. A. Nielsen, ..., C. A. Voigt. 2014. Genomic mining of prokaryotic repressors for orthogonal logic gates. *Nat. Chem. Biol.* 10:99–105.
29. Wu, F., E. Van Rijn, ..., C. Dekker. 2015. Multi-color imaging of the bacterial nucleoid and division proteins with blue, orange, and near-infrared fluorescent proteins. *Front. Microbiol.* 6:607.
30. Weber, S. C., A. J. Spakowitz, and J. A. Theriot. 2010. Bacterial chromosomal loci move subdiffusively through a viscoelastic cytoplasm. *Phys. Rev. Lett.* 104:238102.
31. Weber, S. C., J. A. Theriot, and A. J. Spakowitz. 2010. Subdiffusive motion of a polymer composed of subdiffusive monomers. *Phys. Rev. E Stat. Nonlin. Soft Matter Phys.* 82:011913.
32. Cagliero, C., Y. N. Zhou, and D. J. Jin. 2014. Spatial organization of transcription machinery and its segregation from the replisome in fast-growing bacterial cells. *Nucleic Acids Res.* 42:13696–13705.
33. Sánchez-Romero, M. A., D. J. Lee, ..., S. J. Busby. 2012. Location and dynamics of an active promoter in *Escherichia coli* K-12. *Biochem. J.* 441:481–485.
34. Jin, D. J., C. Cagliero, and Y. N. Zhou. 2013. Role of RNA polymerase and transcription in the organization of the bacterial nucleoid. *Chem. Rev.* 113:8662–8682.
35. Stracy, M., C. Lesterlin, ..., A. N. Kapanidis. 2015. Live-cell superresolution microscopy reveals the organization of RNA polymerase in the bacterial nucleoid. *Proc. Natl. Acad. Sci. USA.* 112:E4390–E4399.
36. Jin, D. J., C. Cagliero, ..., Y. N. Zhou. 2015. The dynamic nature and territory of transcriptional machinery in the bacterial chromosome. *Front. Microbiol.* 6:497.
37. Latulippe, D. R., and A. L. Zydney. 2010. Radius of gyration of plasmid DNA isoforms from static light scattering. *Biotechnol. Bioeng.* 107:134–142.
38. Yeh, J. W., A. Taloni, ..., C. F. Chou. 2012. Entropy-driven single molecule tug-of-war of DNA at micro-nanofluidic interfaces. *Nano Lett.* 12:1597–1602.
39. Tang, J., D. W. Trahan, and P. S. Doyle. 2010. Coil-stretch transition of DNA molecules in slit-like confinement. *Macromolecules.* 43:3081–3089.
40. Lin, P.-k., C.-C. Hsieh, ..., C.-F. Chou. 2012. Effects of topology and ionic strength on double-stranded DNA confined in nanoslits. *Macromolecules.* 45:2920–2927.
41. Weber, S. C., A. J. Spakowitz, and J. A. Theriot. 2012. Nonthermal ATP-dependent fluctuations contribute to the in vivo motion of chromosomal loci. *Proc. Natl. Acad. Sci. USA.* 109:7338–7343.
42. Burnham, K. P., and D. R. Anderson. 2004. Multimodel inference: understanding AIC and BIC in model selection. *Sociol. Methods Res.* 33:261–304.
43. Paulsson, J., and M. Ehrenberg. 1998. Trade-off between segregational stability and metabolic burden: a mathematical model of plasmid ColE1 replication control. *J. Mol. Biol.* 279:73–88.
44. Ghozzi, S., J. Wong Ng, ..., J. Robert. 2010. Inference of plasmid-copy-number mean and noise from single-cell gene expression data. *Phys. Rev. E Stat. Nonlin. Soft Matter Phys.* 82:051916.
45. Bakshi, S., H. Choi, and J. C. Weisshaar. 2015. The spatial biology of transcription and translation in rapidly growing *Escherichia coli*. *Front. Microbiol.* 6:636.

**Biophysical Journal, Volume 116**

**Supplemental Information**

**High-Copy-Number Plasmid Segregation—Single-Molecule Dynamics  
in Single Cells**

**Tai-Ming Hsu and Yi-Ren Chang**

## Supporting Material

### High-copy-number plasmid segregation – single-molecule dynamics in single cells

T.-M. Hsu and Y.-R. Chang\*

#### Plasmid construction

All plasmids were constructed using the In-Fusion Cloning method (Clontech Laboratories, Inc., USA). With this method, plasmids can be directly and directionally constructed in one step from multiple linear DNA fragments with designed overlap. The linear DNA fragments were amplified by PrimeSTAR MAX DNA polymerase (Takara Bio Inc., Japan) to provide fidelity up to 10 kb.

To construct plasmid pTetORK34b, several steps were required. First, an intermediate plasmid pTetR4-4m, encoding self-regulated circuitry,  $P_{tet}::tetR-myfp$ , was designed based on the replication origin from pSOT37, a *cer*-deleted ColE1 derived plasmid, and constructed by direct fusion of the PCR fragments of *tet* promoter from pZS2-123 (1), *tetR* from the chromosome of *E. coli* strain BL21, and the monomeric *myfp* gene. The antibiotic resistance gene *bla* replaced the kanamycin resistance marker from pZS2-123. The tandem repeat sequence of *tetO* from pLAU44 (2), which was digested by restriction enzymes, SphI and SacII, was later fused downstream of *myfp*. The DNA fragment, *L16*, encoding a peptide sequence of TSGSAASAAGAGEAAA, was applied as a linker between *tetR* and *myfp*, and terminator *TSAL2* was inserted between *myfp* and the tandem repeat sequence of *tetO*. Similarly, to construct plasmid pTetORK34p, another intermediate plasmid pTetR4-4p was designed as a derivative of pTetR4-4m with the replacement of  $P_{RNAI}$  for  $P_{phIF}$ . The plasmid was constructed by self-fusion of the PCR-synthesized DNA fragment including the whole plasmid sequence except  $P_{RNAI}$ , with additional  $P_{phIF}$  sequence instead by the primer extension. Unlike the design reported by Panayotatos (3), the promoter and sequence of *RNAI* were entirely used to preserve its original function of regulating the replication of ColE1.

Plasmid pLacOIC2c was constructed by sequential fusions of the ColE1 replication origin from pSOT37, including the PCR fragments of the *lac* promoter and *lacI* gene from the chromosome of *E. coli* strain MG1655, *mcherry* gene from pZS2-123, and the chlorophenol resistance marker from commercial plasmid pPROtet.E (Clontech Laboratories, Inc., USA). The frame-shift mutation from *lacI* gene to *lacI<sup>adi</sup>* was replaced the last 31 codons of the *lacI* gene with 16 codons, preventing LacI<sup>adi</sup> from forming tetramers (4). The tandem repeat sequence of *lacO* was derived from the digestion of pLAU43 (2) with restriction enzymes, BspHI and SacII.

The single-copy plasmids, pZC320-tetO and pZC320-lacO, were constructed by replacing the lactose-

controlled expression system with DNA fragments [ $P_{tet}::tetR\text{-myfp tetO}2x54$ ] (from pTetORK34b) and [ $P_{lac}::lacI^{adi}\text{-mcherry lacO}x90$ ] (from pLacOIC2c) in the mini-F plasmid pZC320 (5), respectively.

Plasmid p15AA-phlFH.tq was constructed from pJM178, a p15A derived plasmid with the arabinose controlled expression system. The chloramphenicol resistance marker was first replaced with the *bla* gene from pMLB1113, and fused *phlF* gene from pAND at the 3'-end of  $P_{BAD}$  with a T7 terminator sequence from pZS2-123. The fragments, including a weak constitutive promoter (mutant of Biobrick J23114), an RBS (BioBrick B0034), *hupA* gene from MG1655 and *mturquoise2* gene from pPalmitoyl-mTurquoise2 (Addgene, USA) were inserted between the p15A origin and 3'-end of *araC* in the opposite direction.

### Calibration of single-plasmid fluorescence

The numbers of plasmids in cells were estimated based on the intensity of single-copy mini-F plasmids, pZC320-tetO and pZC320-lacO. The intensity of a single plasmid was calculated based on the total fluorescence intensities of single cells divided by the numbers of plasmid copies within, which were identified as individual fluorescent spots. Most instances of possible overlap of fluorescent spots were removed from the calculation. However, due to the comparatively lower resolution of the red fluorescence (longer wavelength), there were still some spots which may have represented more than one plasmid, as suggested by a second peak in the fluorescence intensity distribution. From the center intensity of the peaks, the population of the second peak seems to indicate that the spots included two plasmids, and thus, the second peak spots were removed from the calibration. Note that before all calculations, the background from the cytoplasmic auto-fluorescence and the surrounding environment of the gel pad, measured in BW25113FH cells, was subtracted from the overall intensity of cells.

To minimize differences between measurements, several quality control procedures were applied. For all measurements, the cells in all experiments were cultured in the same batches of LB and M9 medium. The culture conditions (i.e., temperature, time, and cell concentration) were precisely controlled. To keep consistency between gel patches, every gel patch was dissolved in the same batch of M9 medium and freshly prepared before the observation period to prevent water evaporation. Also, a temperature- and humidity-control system was utilized during the microscopic observation to maintain the condition of the gel pads. The cover-slides were washed in neutral detergent for 20 min and rinsed three times in pure water for 10 min with sonication. The cleaned cover-slides were stored and sealed in pure water and then dried in pure nitrogen before use. The alignment of the optical path and the laser powers in the setup of the microscope were finely tuned and kept consistent throughout measurement days. To stabilize the laser power and the temperature of the environment, the whole microscopic system was switched on at least one hour before observations were made. Furthermore, for the fluorescent intensity measurements, the fluorescence background from the gel pad was obtained in a region near each cell (5- $\mu\text{m}$  distance around the cell boundary), and the fluorescence deviation between the gel pads was found to be approximately 5%. The cellular auto-fluorescence was



obtained from the average intensity of BW25113FH cells after removing the gel-pad background. The BW25113FH cells were cultured in parallel and spread on the same batch of gel pads on each day of measurement. After subtracting the intensities of the fluorescence background and the auto-fluorescence, the intensity contribution of the plasmids in each cell was obtained as the summation of the intensity of the pixels within the cells. The efficiency of the background subtraction was confirmed based on measurements of BW25113FH cells transformed with single-copy plasmids, pZC320-tetO and pZC320-lacO. The intensity background of these cells can be directly obtained from all the pixels in the cell aside from those identified as plasmids by 2D Gaussian fitting (~6 pixels in length).

The reproducibility of the experimental setup was examined by imaging fluorescent microspheres. In this examination, 0.1- $\mu\text{m}$  fluorescent microspheres (ThermoFisher Scientific, TetraSpeck™ Microspheres) were diluted with M9 medium and spread on the gel pads. The deviation between the average fluorescence intensities of the microspheres in different gel pads was 4%, which agrees with the measured deviation between the gel pads. Thus, 4% also represents an estimation of the systematic deviation between single measurements introduced by the experimental procedure.

The numbers and the standard errors of the plasmids in a single cell were predicted as follows. Assume a number of plasmids  $N$  in a cell. The fluorescence intensity of this cell after removing the background can be statistically predicted as  $F = N F_1 \pm N^{1/2} \Delta F_1$ , where  $F_1$  and  $\Delta F_1$  are the mean and the standard deviation of the measured intensity of cells containing single plasmids (**Figure S1B**). Therefore, in our experiments, from the measured fluorescent intensity  $F$  in a cell, the number of plasmids  $N$  and the uncertainty  $\Delta N$  of plasmids can be approximated by  $N \pm \Delta N \sim (F / F_1) \pm (\Delta F_1 / F_1) (F / F_1)^{1/2}$ . From **Figure S1B**, the relative deviations between single plasmids  $\Delta F_1 / F_1$  were 30% and 37% for [ $P_{tet}::tetR\text{-myfp}$   $tetO2x54$ ] and [ $P_{lac}::lacI^{\text{adi}}\text{-mcherry}$   $lacOx90$ ] cassettes, respectively. Compared to the systematic deviation, the deviations between single plasmids should be majorly derived from the board occupancy rate of the  $tetO$  and  $lacO$  arrays. Note that since the number of the plasmids should be naturally an integer, the number of plasmids  $N$  is presented as the nearest integer of the value of  $(F / F_1)$ . Regarding the uncertainty, in a single measurement from a single cell, if the predicted number of plasmids is 40, for instance, the uncertainty will be roughly 7. In another example related to the cells in the replication repression experiments (**Figure 1C and 1D**), the numbers of plasmid pTetORK34p were often only a few; the uncertainty would be 2 in a cell with a predicted plasmid number of 4. With regard to the experiments on single plasmid tracking, in order to ensure the tracked fluorescent spots actually represent single plasmids, only the spots with intensities less than  $F_1$  and fitted spot widths less than 250 nm were considered. According to the results of the single  $tetO$  tandem array (**Figure S1B**,  $F_1 \pm \Delta F_1 \sim 74000 \pm 22000$ ), a fluorescent spot representing two plasmids will have a predicted fluorescence of  $F \pm \Delta F \sim 148000 \pm 31000$ , and the respective probability that the apparent fluorescence is less than  $F_1$  would be statistically less than 2.5%.

The average total numbers of pTetORK34b and pLacOIC2c in a host cell (*E. coli* BW25113FH) were  $42 \pm 2$  (mean  $\pm$  SE,  $N_{\text{cell}} = 150$ ), which was verified by quantitative PCR ( $\sim 40$  plasmids per cell, **Figure S3**), following a similar procedure as used in a previous report (6). This number also agrees with the earlier measurements made by quantitative PCR and super-resolution imaging (6, 7). Likewise, the numbers of pZC320-tetO and pZC320-lacO measured by quantitative PCR were approximately 1 (**Figure S3**), validating the appropriateness for these two plasmids to be used as unit calibrations of the fluorescent intensities of single cassettes. The standard errors of the average numbers of plasmids within a single cell were obtained from the uncertainty of each measurement and the statistics of the samples. The experimental uncertainty of the inherited plasmid numbers in daughter cells is similarly calculated by accounting into the uncertainties in all single measurements.

#### Influence of FROS system

The interaction between plasmids due to FROS cassettes, i.e., additional affinity or repulsion, was examined based on the inheritance of the co-transformed pTetORK34b and pLacOIC2c in the host cells (**Figure 1B** and **S1A**). Two selection markers, kanamycin and chloramphenicol, were respectively encoded in pTetORK34b and pLacOIC2c for the co-transformation experiments (8). As shown in **Figure S1C**, the correlation coefficient between quantity ratios ( $N_{P1,D}/N_{P1,P}$  and  $N_{P2,D}/N_{P2,P}$ ) is approximately 0.22, where  $N_{P1,P}$ ,  $N_{P2,P}$ ,  $N_{P1,D}$  and  $N_{P2,D}$  are the parental and inherited quantities of the plasmids pTetORK34b and pLacOIC2c, respectively. The weak correlation between these two inherited populations suggests the FROS cassettes are independent with regard to plasmid segregation, and the plasmids encoded in these two cassettes can be considered to be physiologically identical in the host cells.

#### Incompatibility of *ColE1* origin

The ability to observe the trajectories of single plasmids requires that the cells contain only a few copies of optically resolvable pTetORK34b or pLacOIC2c. Statistical analysis of the quantities of these two plasmids shows that there is a wide range of copies in the host cells (**Figure S1D**). Roughly 50% of the host cells contain more than a four-fold difference in the numbers of plasmids (where  $N_{P1}/(N_{P1}+N_{P2})$  is smaller than 0.2 or larger than 0.8). This result is consistent with the phenomenon of incompatibility between plasmids containing similar replication origins. In other words, because of competition for the RNA primer *RNAII* to initiate replication (9), there is a tendency for one plasmid to be preferred and dominate replication machinery. However, even with this incompatibility, only 10% of the cells exhibited a differentiable single plasmid from the majority ( $N_{P1} = 1$  or  $N_{P2} = 1$ ), which was not sufficient to conduct our experiments and required the addition of replication control.

## Reference

1. Cox, R. S., 3rd, M. J. Dunlop, and M. B. Elowitz. 2010. A synthetic three-color scaffold for monitoring genetic regulation and noise. *Journal of biological engineering* 4:10.
2. Lau, I. F., S. R. Filipe, B. Søballe, O.-A. Økstad, F.-X. Barre, and D. J. Sherratt. 2004. Spatial and temporal organization of replicating *Escherichia coli* chromosomes. *Molecular microbiology* 49(3):731-743.
3. Panayotatos, N. 1984. DNA replication regulated by the priming promoter. *Nucleic acids research* 12(6):2641-2648.
4. Brenowitz, M., N. Mandal, A. Pickar, E. Jamison, and S. Adhya. 1991. DNA-binding properties of a lac repressor mutant incapable of forming tetramers. *The Journal of biological chemistry* 266(2):1281-1288.
5. Shi, J., and D. P. Biek. 1995. A versatile low-copy-number cloning vector derived from plasmid F. *Gene* 164(1):55-58.
6. Wang, Y., P. Penkul, and J. N. Milstein. 2016. Quantitative localization microscopy reveals a novel organization of a high-copy number plasmid. *Biophysical journal* 111(3):467-479.
7. Skulj, M., V. Okrslar, S. Jalen, S. Jevsevar, P. Slanc, B. Strukelj, and V. Menart. 2008. Improved determination of plasmid copy number using quantitative real-time PCR for monitoring fermentation processes. *Microbial cell factories* 7:6.
8. Velappan, N., D. Sblattero, L. Chasteen, P. Pavlik, and A. R. Bradbury. 2007. Plasmid incompatibility: more compatible than previously thought? *Protein engineering, design & selection : PEDS* 20(7):309-313.
9. Eguchi, Y., T. Itoh, and J. Tomizawa. 1991. Antisense RNA. *Annual Review of Biochemistry* 60(1):631-652.
10. Datsenko, K. A., and B. L. Wanner. 2000. One-step inactivation of chromosomal genes in *Escherichia coli* K-12 using PCR products. *Proceedings of the National Academy of Sciences of the United States of America* 97(12):6640-6645.

**Table S1** Bacterial strains and plasmids

| Strain or plasmid | Sequence                                                                                                                                                                  | Source                            |
|-------------------|---------------------------------------------------------------------------------------------------------------------------------------------------------------------------|-----------------------------------|
| Strain            |                                                                                                                                                                           |                                   |
| BW25113           | <i>F</i> -, $\Delta$ ( <i>araD-araB</i> )567, $\Delta$ <i>lacZ</i> 4787(:: <i>rrnB</i> -3), $\lambda$ -, <i>rph</i> -1, $\Delta$ ( <i>rhaD-rhaB</i> )568, <i>hsdR</i> 514 | E. coli Genetic Stock Center (10) |
| BW25113FH         | BW25113/ p15AA-phlFH.tq                                                                                                                                                   | This study                        |
| Plasmid           |                                                                                                                                                                           |                                   |
| pJMJ178           | <i>P</i> 15A, <i>P</i> <sub>c</sub> :: <i>araC</i> , <i>P</i> <sub>BAD</sub> :: <i>lacI-gfp</i> , <i>cat</i>                                                              | Gift from Dr. Kenn Gerdes         |
| p15AA-phlFH.tq    | <i>P</i> 15A, <i>P</i> <sub>c</sub> :: <i>araC</i> , <i>P</i> <sub>BAD</sub> :: <i>phlF</i> , <i>P</i> <sub>I23119</sub> :: <i>hupA-mturquoise</i> , <i>bla</i>           | This study                        |
| pSOT37            | <i>ColE1</i> , <i>P</i> <sub>lac</sub> :: <i>minD minE-cypet</i> , <i>lacZ</i> :: <i>lacY'</i> , <i>bla</i>                                                               | Gift from Dr. Chia-Fu Chou        |
| pTetR4-4m         | <i>ColE1</i> , <i>P</i> <sub>tet</sub> :: <i>tetR-myfp</i> , <i>aphA</i>                                                                                                  | This study                        |
| pTetORK34b        | <i>ColE1</i> , <i>P</i> <sub>tet</sub> :: <i>tetR-myfp</i> , <i>tetO</i> 2x54, <i>aphA</i>                                                                                | This study                        |
| pLacI2-2          | <i>ColE1</i> , <i>P</i> <sub>lac</sub> :: <i>lacI</i> <sup>adi</sup> - <i>mcherry</i> , <i>cat</i>                                                                        | This study                        |
| pLacOIC2c         | <i>ColE1</i> , <i>P</i> <sub>lac</sub> :: <i>lacI</i> <sup>adi</sup> - <i>mcherry</i> , <i>lacO</i> 2x90, <i>cat</i>                                                      | This study                        |
| pTetR4-4p         | <i>ColE1</i> $\Delta$ <i>P</i> <sub>RNAII</sub> :: <i>P</i> <sub>phlF</sub> , <i>P</i> <sub>tet</sub> :: <i>tetR-myfp</i> , <i>aphA</i>                                   | This study                        |
| pTetORK34p        | <i>ColE1</i> $\Delta$ <i>P</i> <sub>RNAII</sub> :: <i>P</i> <sub>phlF</sub> , <i>P</i> <sub>tet</sub> :: <i>tetR-myfp</i> , <i>tetO</i> 2x54, <i>aphA</i>                 | This study                        |
| pZC320-tetO       | <i>mini-F</i> , <i>P</i> <sub>tet</sub> :: <i>tetR-myfp</i> , <i>tetO</i> 2x54, <i>bla</i>                                                                                | This study                        |
| pZC320-lacO       | <i>mini-F</i> , <i>P</i> <sub>lac</sub> :: <i>lacI</i> <sup>adi</sup> - <i>mcherry</i> , <i>lacO</i> 2x90, <i>bla</i>                                                     | This study                        |



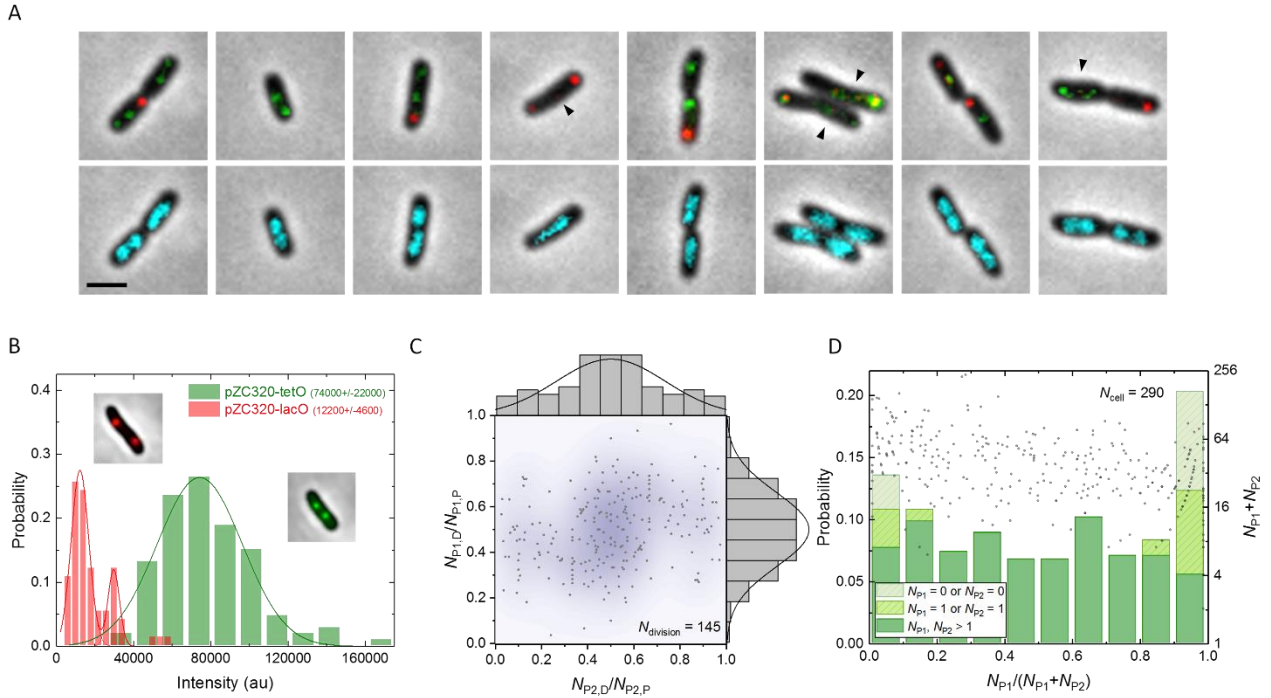

**Figure S1.** The applicability of the two-color self-regulated FROS on plasmids (pTetORK34b and pLacOIC2c) co-transformed in cells. (A) The merged sets of phase contrast images and fluorescence images show co-transformed plasmids pTetORK34b (P1; upper panel, green) and pLacOIC2c (P2; upper panel, red), as well as the nucleoids (lower panel, cyan). The arrows indicate possible single plasmids traveling around the nucleoids. The scale bar equals 2  $\mu\text{m}$ . (B) The calibration of the fluorescence intensity by single self-regulated FROS plasmids. The measurement was made on cells transformed with single-copy plasmids, pZC320-tetO and pZC320-lacO, which encode the FROS genes, TetR-mYFP/*tetOx54* (green;  $N = 116$ ) and LacI<sup>adi</sup>-mCherry/*lacOx90* (red;  $N = 77$ ), respectively. The overlap of plasmids is resolvable as a second peak in the fluorescence intensity of pZC320-lacO. (C) The correlation between the inherited ratio of pTetORK34b (P1) and pLacOIC2c (P2). Each spot indicates the quantity ratios,  $N_{P1,D}/N_{P1,P}$  and  $N_{P2,D}/N_{P2,P}$ , from a single daughter cell and its parent cell. The density plot represents the probability density distribution. The individual probability densities of  $N_{P1,D}/N_{P1,P}$  and  $N_{P2,D}/N_{P2,P}$  are shown as the right and upper panels, respectively. The similar distributions and weak correlation (correlation coefficient  $\sim 0.22$ ) suggest that P1 and P2 are physiologically identical with regard to segregation. (D) The total quantities (spots for single cells; right axis) and the corresponding probability histogram (bar chart; left axis) to the portion of pTetORK34b (P1) in all plasmids. In the probability histogram, the portions of cells without or with a single pTetORK34b (leftmost bars) or pLacOIC2c (P2; rightmost bars) are marked individually. Incidentally, the asymmetry between pTetORK34b and pLacOIC2c may be due to differences in antibiotic selection.

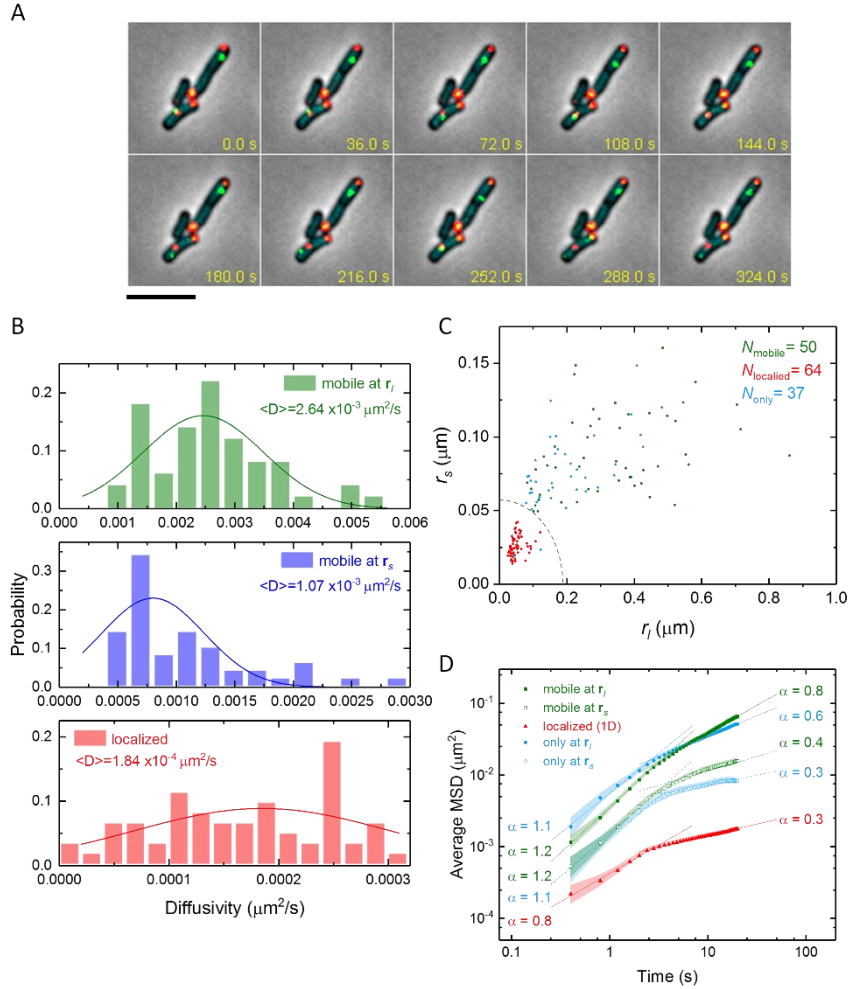

**Figure S2.** Plasmid motion resolved by single plasmid tracking. (A) An image sequence of nucleoids (dim cyan), plasmids pTetORK34p (green) and pLacOIC2c (red), and the cell outlines (phase contrast; gray) is shown. Each of the green spots is a single pTetORK34p plasmid, and the overlap of pTetORK34p and pLacOIC2c is shown in yellow. To better visualize single plasmids, the green fluorescent intensity has been multiplied 12-fold with respect to **Figure 1A** and **S1A**. The scale bar equals 5  $\mu\text{m}$ . (B) The diffusion coefficients of the localized plasmids (red), as well as for mobile plasmids along the long (green) and short (blue) characteristic axes. The diffusion coefficients were calculated from the linear fits of the mean square displacements of single trajectories where  $\tau \leq 2$ . (C) A scatter plot shows the characteristic lengths of the 5-min trajectories of single localized (red) and mobile (green) pTetORK34p plasmids from **Figure 2B**, as well as those in cells containing only one pTetORK34p plasmid (cyan). (D) The average mean square displacements of the localized (red) and mobile (green) pTetORK34p plasmids, as well as the cells with only one pTetORK34p copy (cyan). The long (solid) and short (dashed) axes of the mobile and single plasmids were analyzed separately. The color bands represent the standard errors of the means. The distribution in (C) and the behaviors in (D) of the single plasmids are similar to those of the mobile plasmids and contrast with those of localized plasmids.

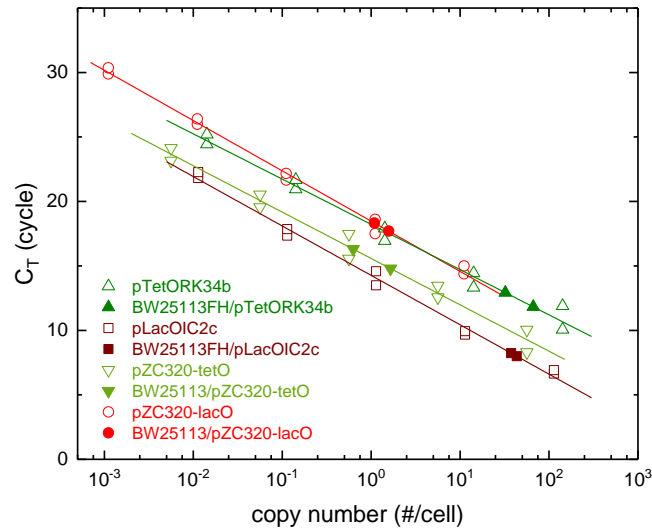

**Figure S3.** Average plasmid numbers of pTetORK34b (dim green), pLacOIC2c (dim red), pZC320-tetO (light green), and pZC320-lacO (light red) in cells measured by quantitative PCR. The standard curves were the linear-log fits of the measurements of the known plasmid concentrations (hollow spots), of which effective copy numbers were calculated from the cell concentrations of the respective cell samples. The standard curves were applied to estimate the copy numbers per bacterial cell in the cell samples (solid spots). The average numbers of pTetORK34b and pLacOIC2c were approximately 40, and those of pZC320-tetO and pZC320-lacO were about 1.

### **Description of supplemental videos**

**VideoS1.** Two-color self-regulated FROS on co-transformed plasmids in live cells (BW25113FH/pTetORK34b, pLacOIC2c). Respective colors: nucleoids (blue), plasmids pTetORK34b (green) and pLacOIC2c (red), and cell outlines (phase contrast; gray).

**VideoS2.** Five minutes of motion of single pTetORK34p plasmids in live cells (BW25113FH/pTetORK34p, pLacOIC2c) during the cell cycle. Respective colors: nucleoids (cyan), plasmids pTetORK34b (green) and pLacOIC2c (red), and cell outlines (phase contrast; gray).

**VideoS3.** Typical motion of a single pTetORK34p plasmid during the cell cycle (BW25113FH/pTetORK34p, pLacOIC2c). Respective colors: nucleoids (cyan), plasmids pTetORK34p (green), and cell outlines (phase contrast; gray).
